# Supplementary material for: Metastatic Breast Cancer Recurrence after Bone Fractures
Source: MDPI journal article supplement (doi:10.3390/cancers14030601), 2022-01-25
Supplement: s1 [file s1]

## Supplementary Materials

**Table S1.** International Statistical Classification of Diseases and Related Health Problems 10th Revision (ICD-10)-WHO.

---

### **C00-C97 Malignant Neoplasms**

---

C00-C75 Malignant neoplasms, stated or presumed to be primary, of specified sites, except of lymphoid, haematopoietic and related tissue

C00-C14 Malignant neoplasms of lip, oral cavity and pharynx

C15-C26 Malignant neoplasms of digestive organs

C30-C39 Malignant neoplasms of respiratory and intrathoracic organs

C40-C41 Malignant neoplasms of bone and articular cartilage

C43-C44 Melanoma and other malignant neoplasms of skin

C45-C49 Malignant neoplasms of mesothelial and soft tissue

C50-C50 Malignant neoplasm of breast

C51-C58 Malignant neoplasms of female genital organs

C60-C63 Malignant neoplasms of male genital organs

C64-C68 Malignant neoplasms of urinary tract

C69-C72 Malignant neoplasms of eye, brain and other parts of central nervous system

C73-C75 Malignant neoplasms of thyroid and other endocrine glands

C76-C80 Malignant neoplasms of ill-defined, secondary and unspecified sites

C81-C96 Malignant neoplasms, stated or presumed to be primary, of lymphoid, haematopoietic and related tissue

C97-C97 Malignant neoplasms of independent (primary) multiple sites

### **M80-M82 Disorders of bone density**

M80 Osteoporosis with pathological fracture

M81 Osteoporosis without pathological fracture

M82 Osteoporosis in diseases classified elsewhere

---

**Table S2.** Frequencies of types of fractures after breast cancer diagnosis.

| <b>Fracture at/After Diagnosis (ICD-10 S, T and M80) <sup>a</sup></b> |              |
|-----------------------------------------------------------------------|--------------|
| <b>N = 13,579</b>                                                     |              |
| <b>Type of first fracture (ICD-10 codes S or T or M80)</b>            |              |
| Extremities (lower & upper)                                           | 6778 (49.9)  |
| Pathological fractures M80                                            | 2488 (18.3)  |
| Spine/pelvis                                                          | 1855 (13.7)  |
| Rib/episternum                                                        | 828 (6.1)    |
| Hip/femoral neck                                                      | 714 (5.3)    |
| Head/Face                                                             | 439 (3.2)    |
| Not otherwise specified                                               | 394 (2.9)    |
| <b>Number of different fractures</b>                                  |              |
| One specific ICD-code                                                 | 11028 (81.2) |
| More than one specific ICD-code                                       | 2551 (18.8)  |

<sup>a</sup> Presented are N (percentage).

**Table S3.** Sensitivity analyses of associations between fractures and metastasis by excluding breast cancer diagnoses in 2015 and extended waiting period to metastasis of more than one year, and of patients who received endocrine therapy as an indicator for ER positive breast cancer.\*.

|                                                                 |             | Overall Metastasis       | Lymph Node Metastasis | Distant Non-Bone Metastasis | Distant Bone Metastasis  |
|-----------------------------------------------------------------|-------------|--------------------------|-----------------------|-----------------------------|--------------------------|
| <b>Model 4:</b>                                                 |             |                          |                       |                             |                          |
| Extended waiting period >1 year, BCa diagnosis in 2015 included | N (events)  | 78,238 (5,332)           | 78,238 (2,255)        | 78,238 (3,847)              | 78,238 (1,716)           |
| Fractures at/after BCa diagnosis                                | HR (95%-CI) | <b>1.09 (1.02, 1.19)</b> | 1.04 (0.92, 1.18)     | <b>1.13 (1.03, 1.24)</b>    | 1.13 (0.99, 1.29)        |
| <b>Model 5:</b>                                                 |             |                          |                       |                             |                          |
| Extended waiting period >1 year, BCa diagnosis in 2015 excluded | N (events)  | 17,068 (593)             | 17,068 (293)          | 17,068 (375)                | 17,068 (169)             |
| Fractures at/after BCa diagnosis                                | HR (95%-CI) | 0.99 (0.71, 1.36)        | 0.86 (0.53, 1.39)     | 1.26 (0.88, 1.82)           | 1.18 (0.70, 2.00)        |
| <b>Patients with endocrine therapy</b>                          |             |                          |                       |                             |                          |
| <b>Model 6:</b>                                                 |             |                          |                       |                             |                          |
| Inclusion of BCa diagnosis in 2015                              | N (events)  | 38,451 (4,341)           | 38,451 (2,008)        | 38,451 (2,938)              | 38,451 (1,604)           |
| Fractures at/after BCa diagnosis                                | HR (95%-CI) | <b>1.15 (1.04, 1.26)</b> | 1.05 (0.91, 1.22)     | <b>1.24 (1.11, 1.38)</b>    | <b>1.20 (1.04, 1.39)</b> |
| <b>Model 7:</b>                                                 |             |                          |                       |                             |                          |
| BCa diagnosis in 2015 excluded                                  | N (events)  | 12,934 (709)             | 12,934 (403)          | 12,934 (354)                | 12,934 (165)             |
| Fractures at/after BCa diagnosis)                               | HR (95%-CI) | 0.90 (0.63, 1.30)        | 0.66 (0.38, 1.16)     | 1.22 (0.80, 1.87)           | <b>1.78 (1.07, 2.95)</b> |

\*All models were stratified by year of diagnosis (4 or 3 strata) and adjusted for age, osteoporosis, endocrine therapy, aromatase inhibitor, second tumors, other tumors prior diagnoses, and source of BCa diagnosis. Most covariates were included as time-dependent variables except of age, source of BCa diagnosis, and other tumors before diagnosis. Reference category is "No fracture", respectively. Bold: statistically significant exposure estimates.
